# Supplementary material
Source: PubMed Central journal article supplement (PMC2674140)

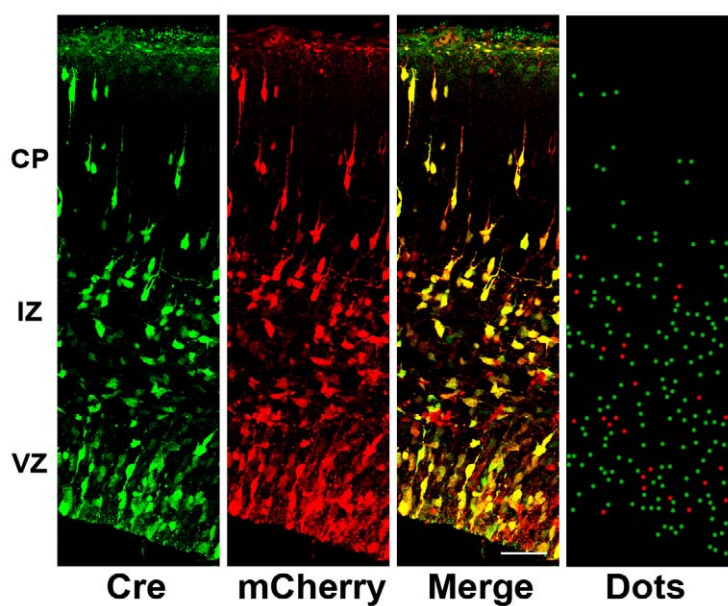

### Fluorescent-Only Controls Internal Controls

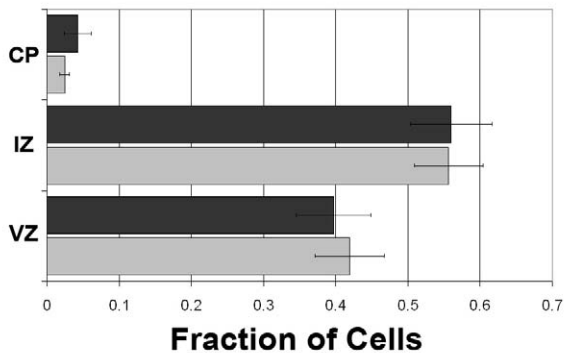

Supplement: NIHMS90485-supplement-01.pdf [file NIHMS90485-supplement-01.pdf]

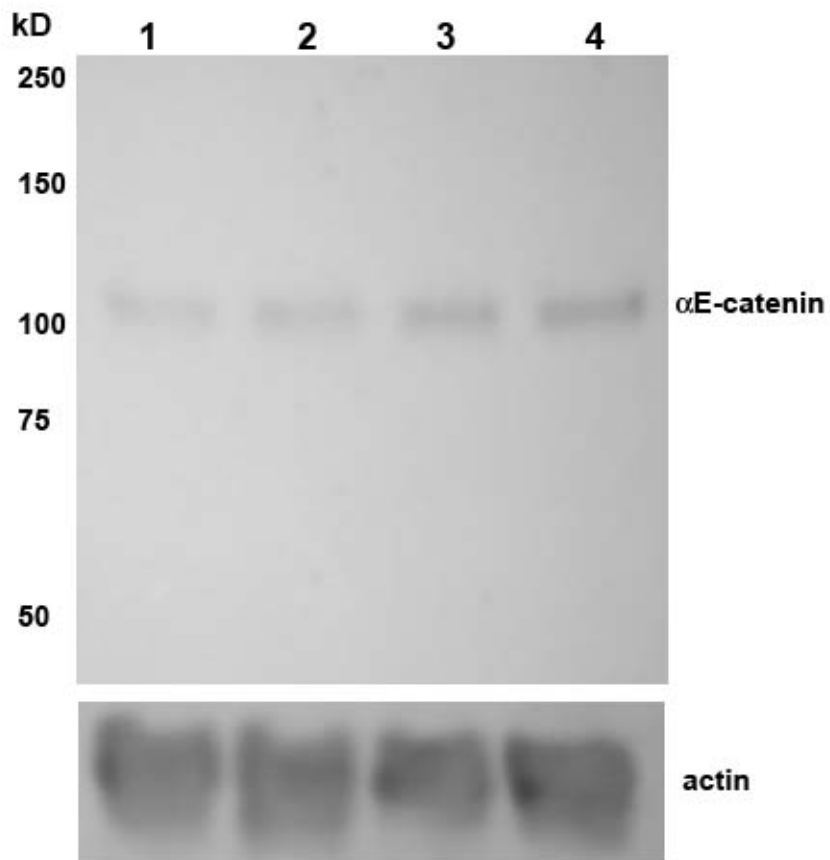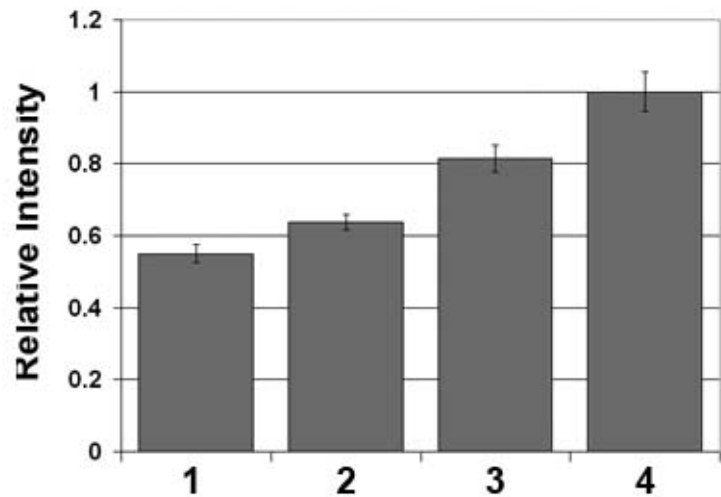

Supplement: NIHMS90485-supplement-02.pdf [file NIHMS90485-supplement-02.pdf]

**A** **Fluorescent Only Control**  
shRNA Control

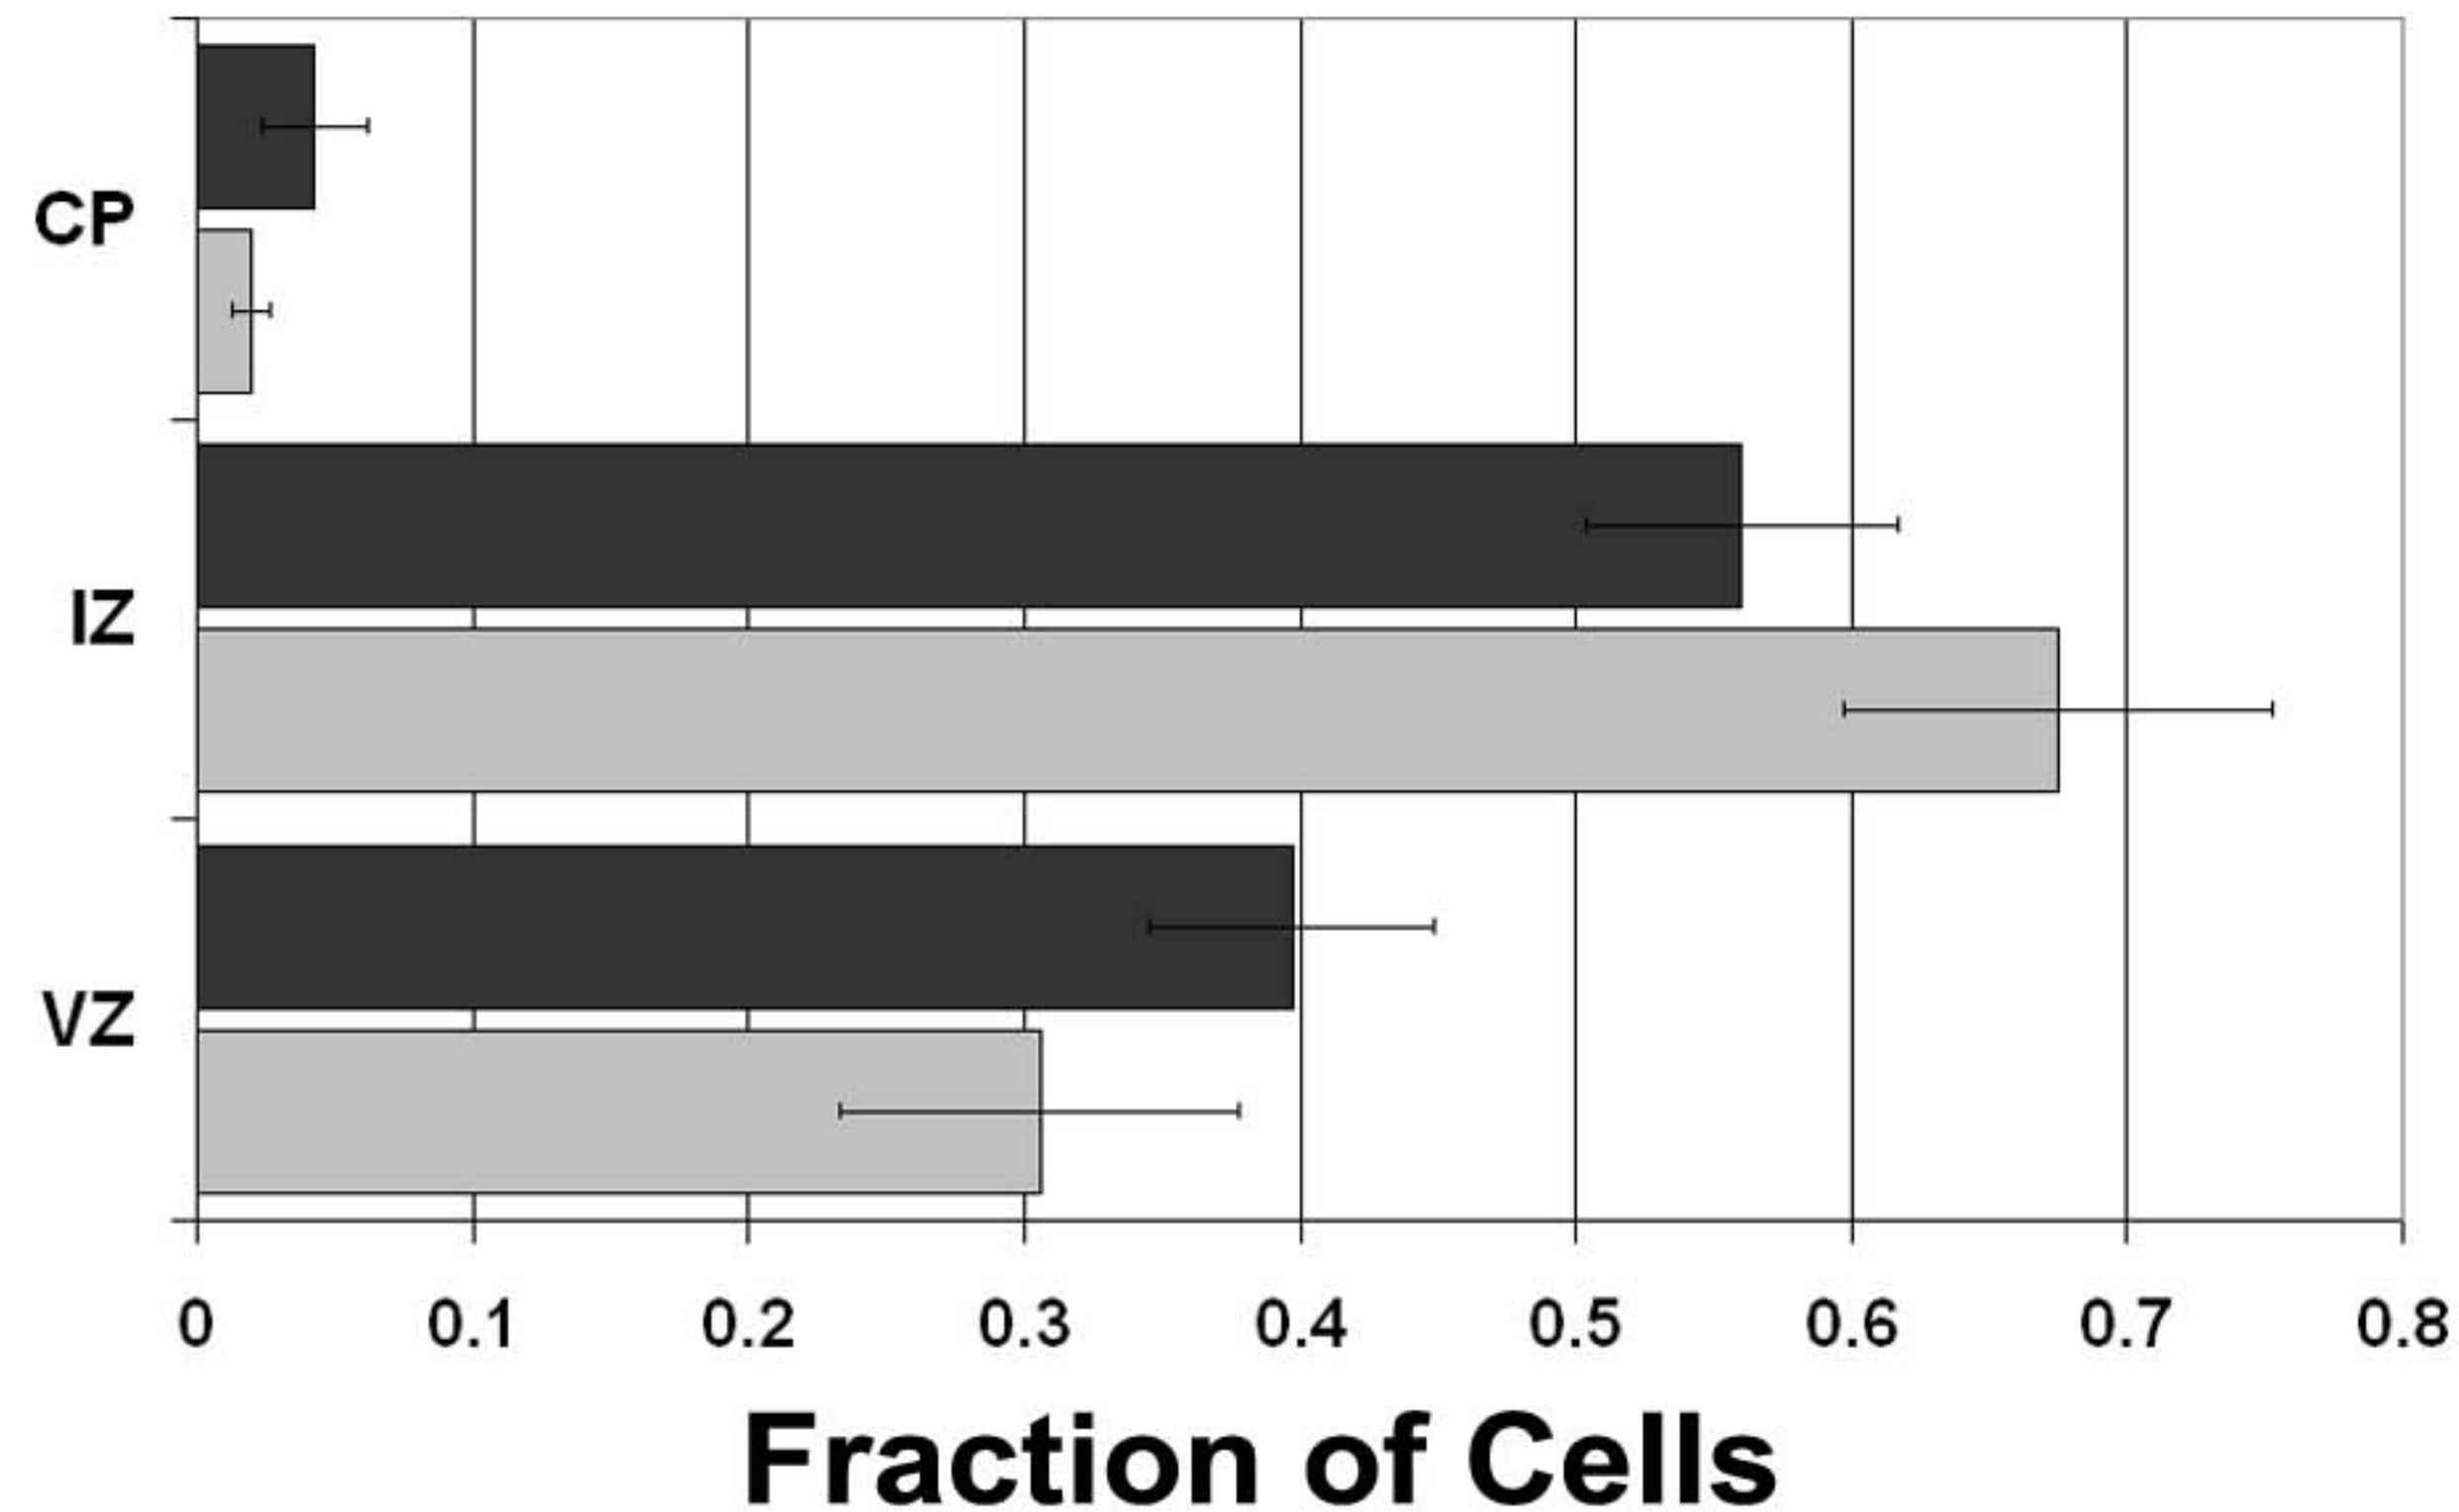

**B** **Catna1<sup>-/-</sup> Control**  
Cre-Recombinase Control

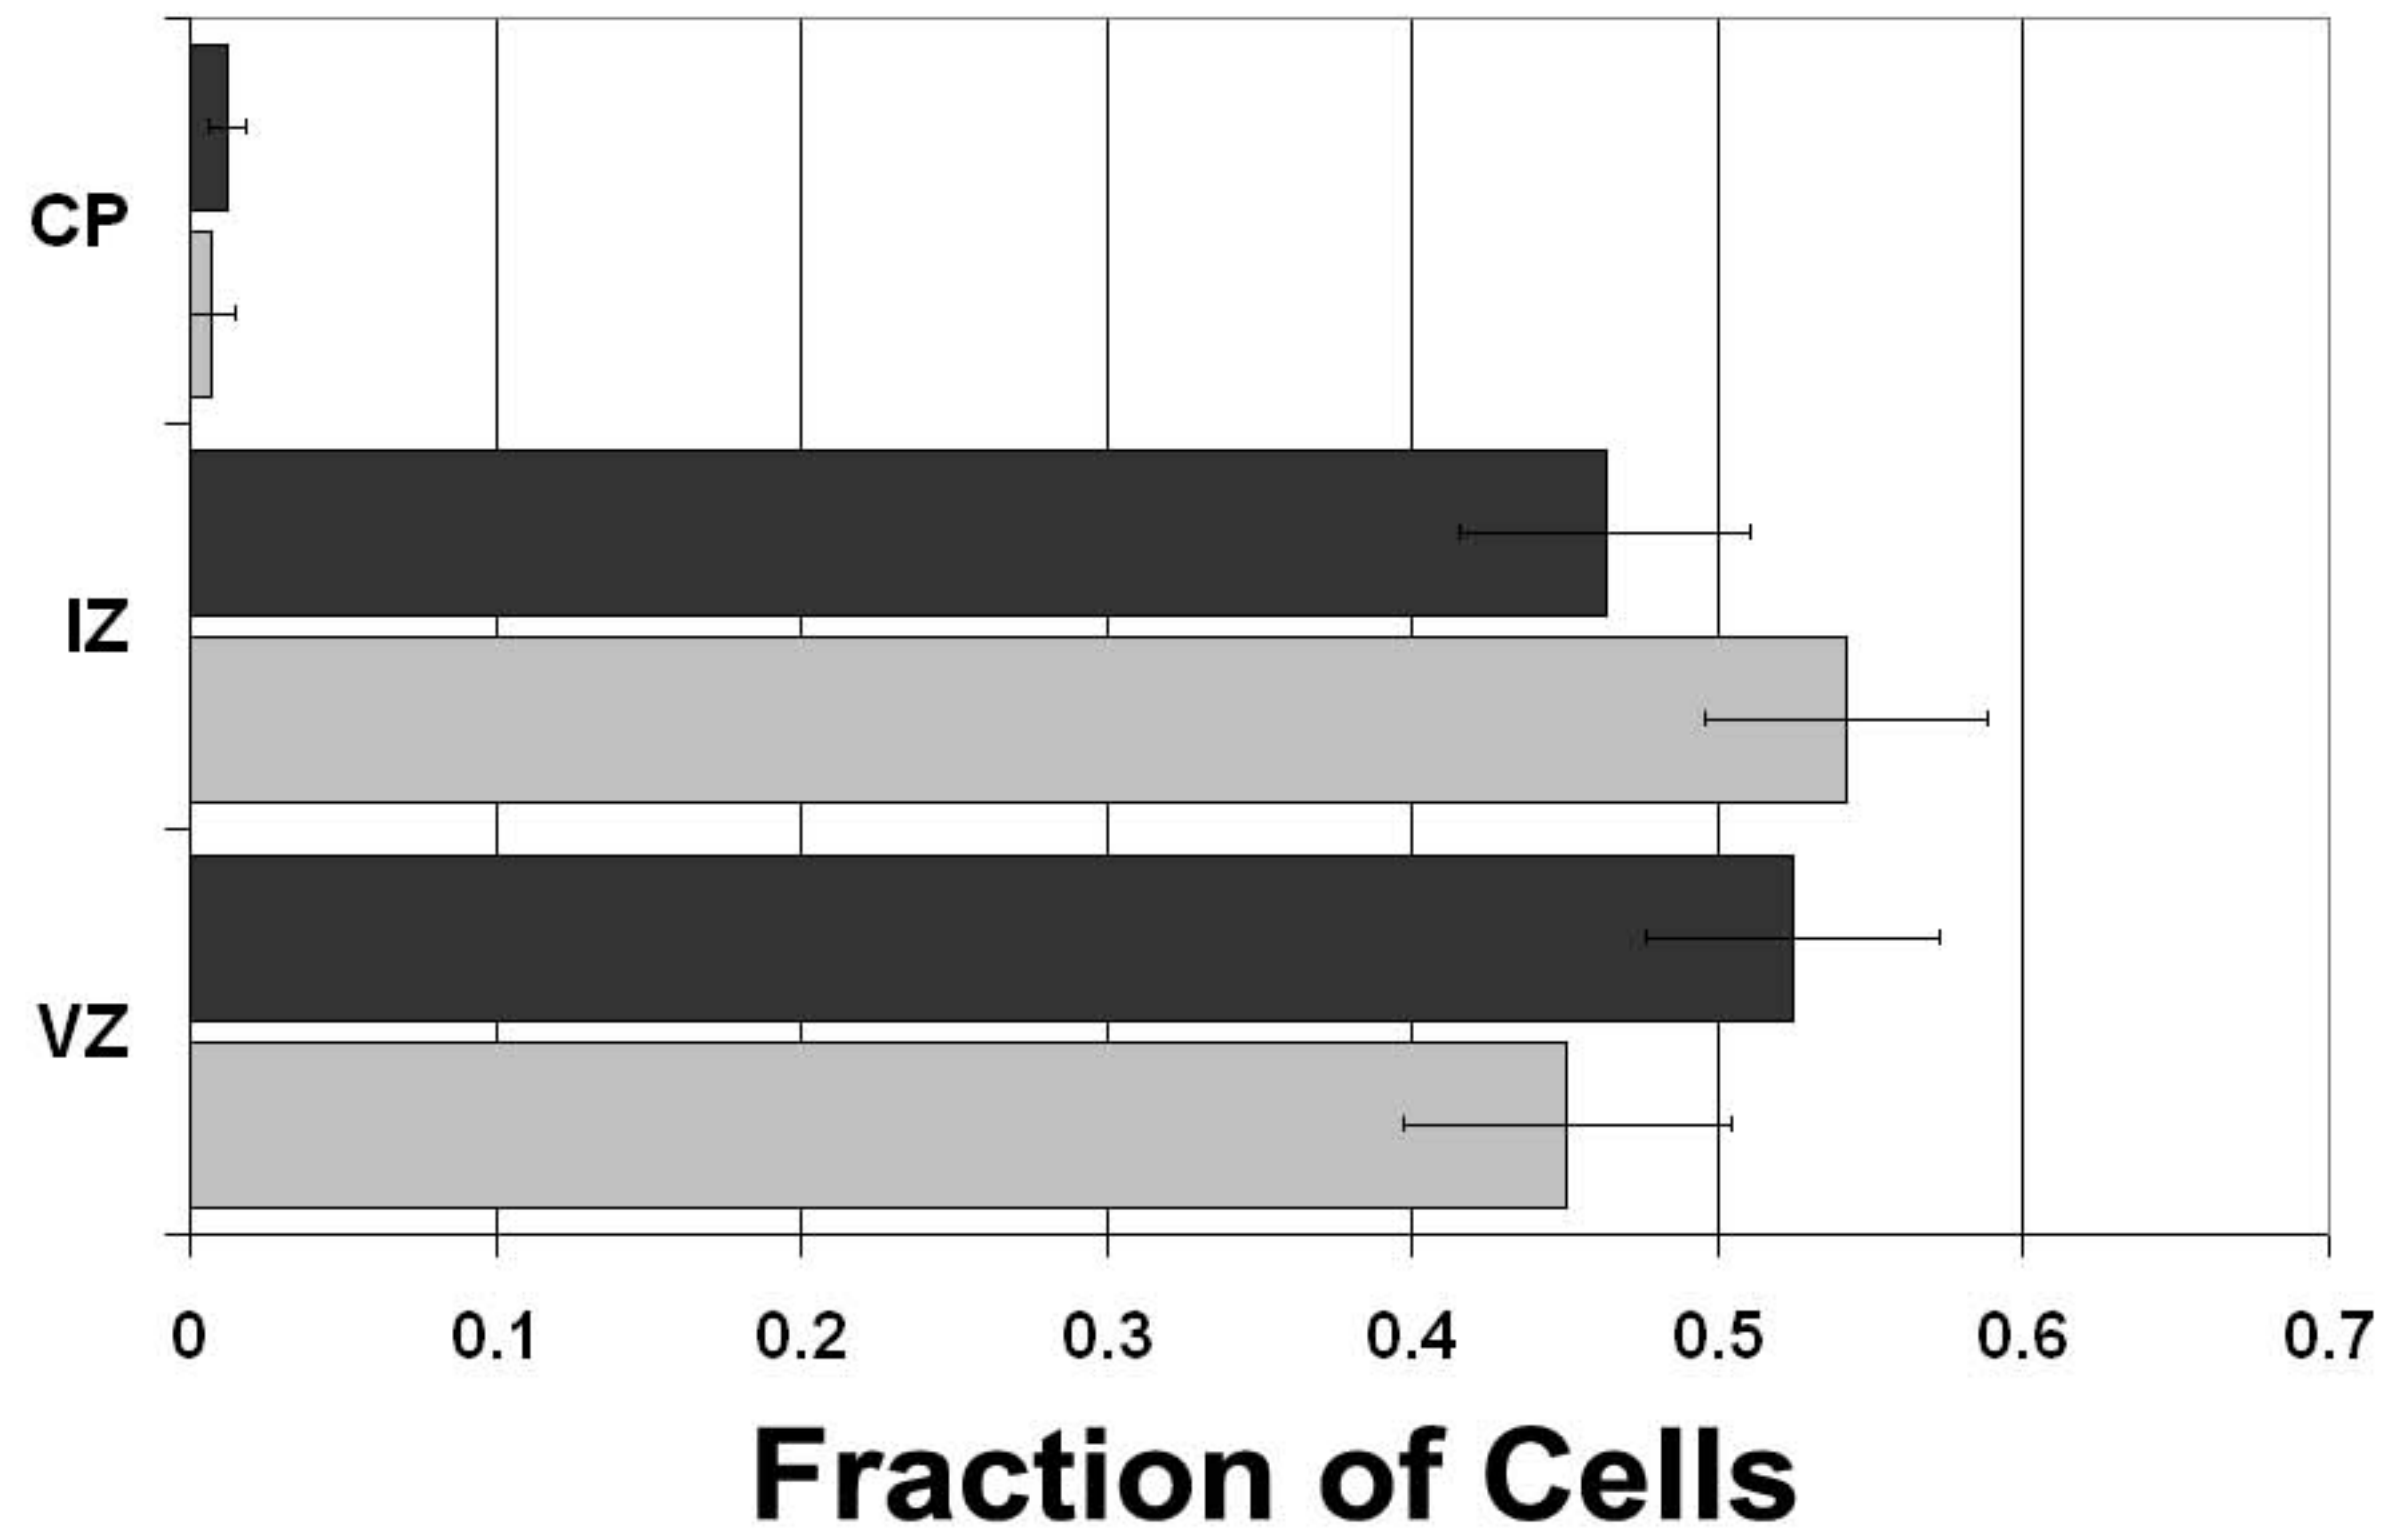

Supplement: NIHMS90485-supplement-03.pdf [file NIHMS90485-supplement-03.pdf]

**mCherry****dGFP****Merge**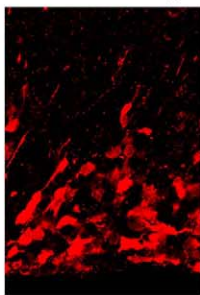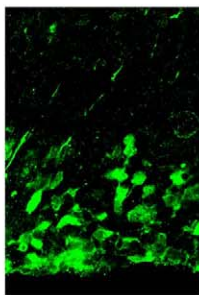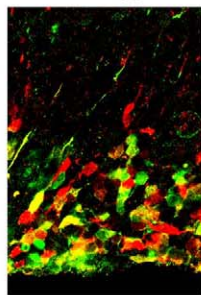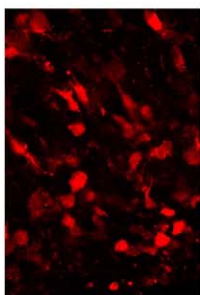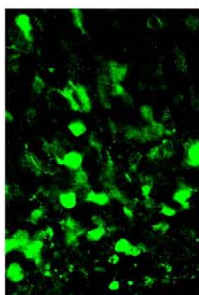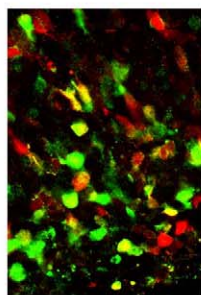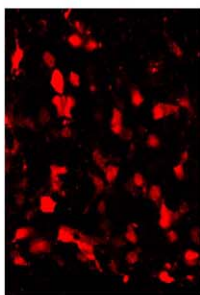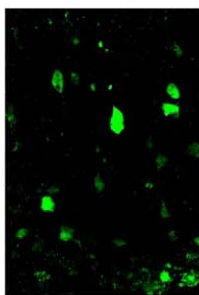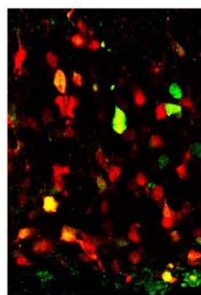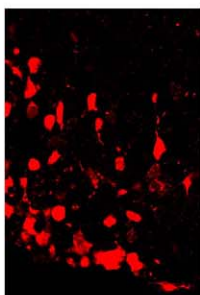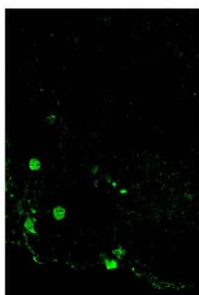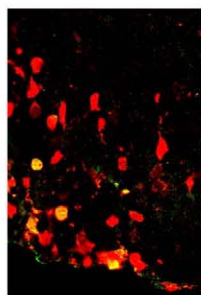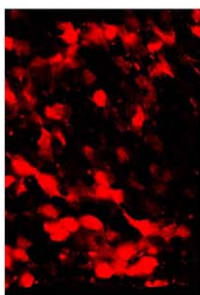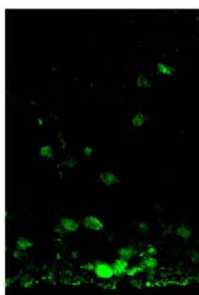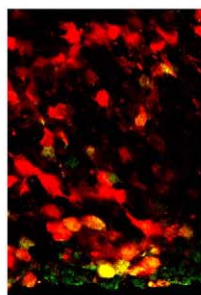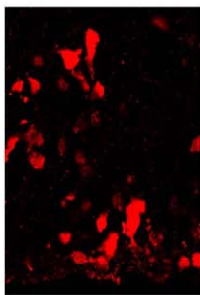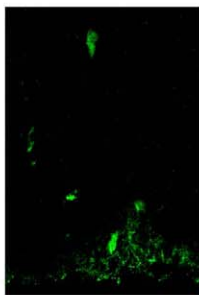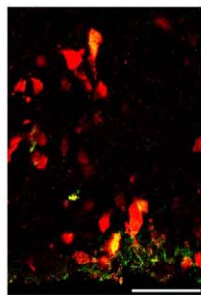**Control****Cre****shRNA**

Supplement: NIHMS90485-supplement-04.pdf [file NIHMS90485-supplement-04.pdf]

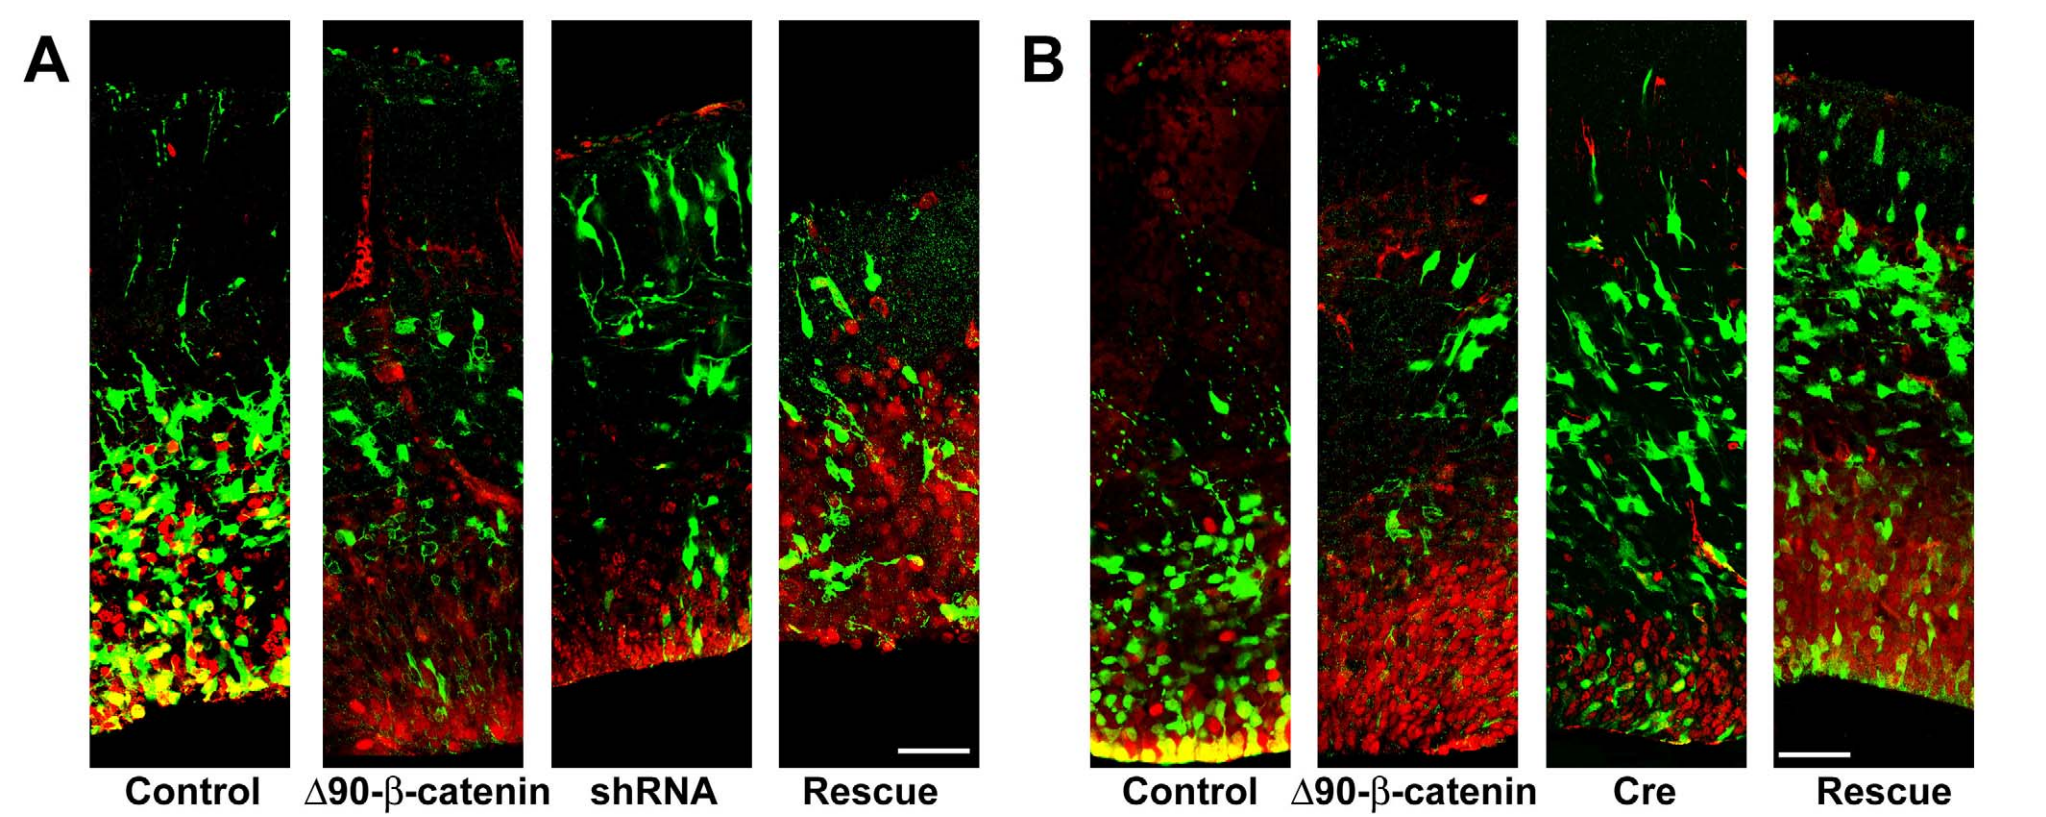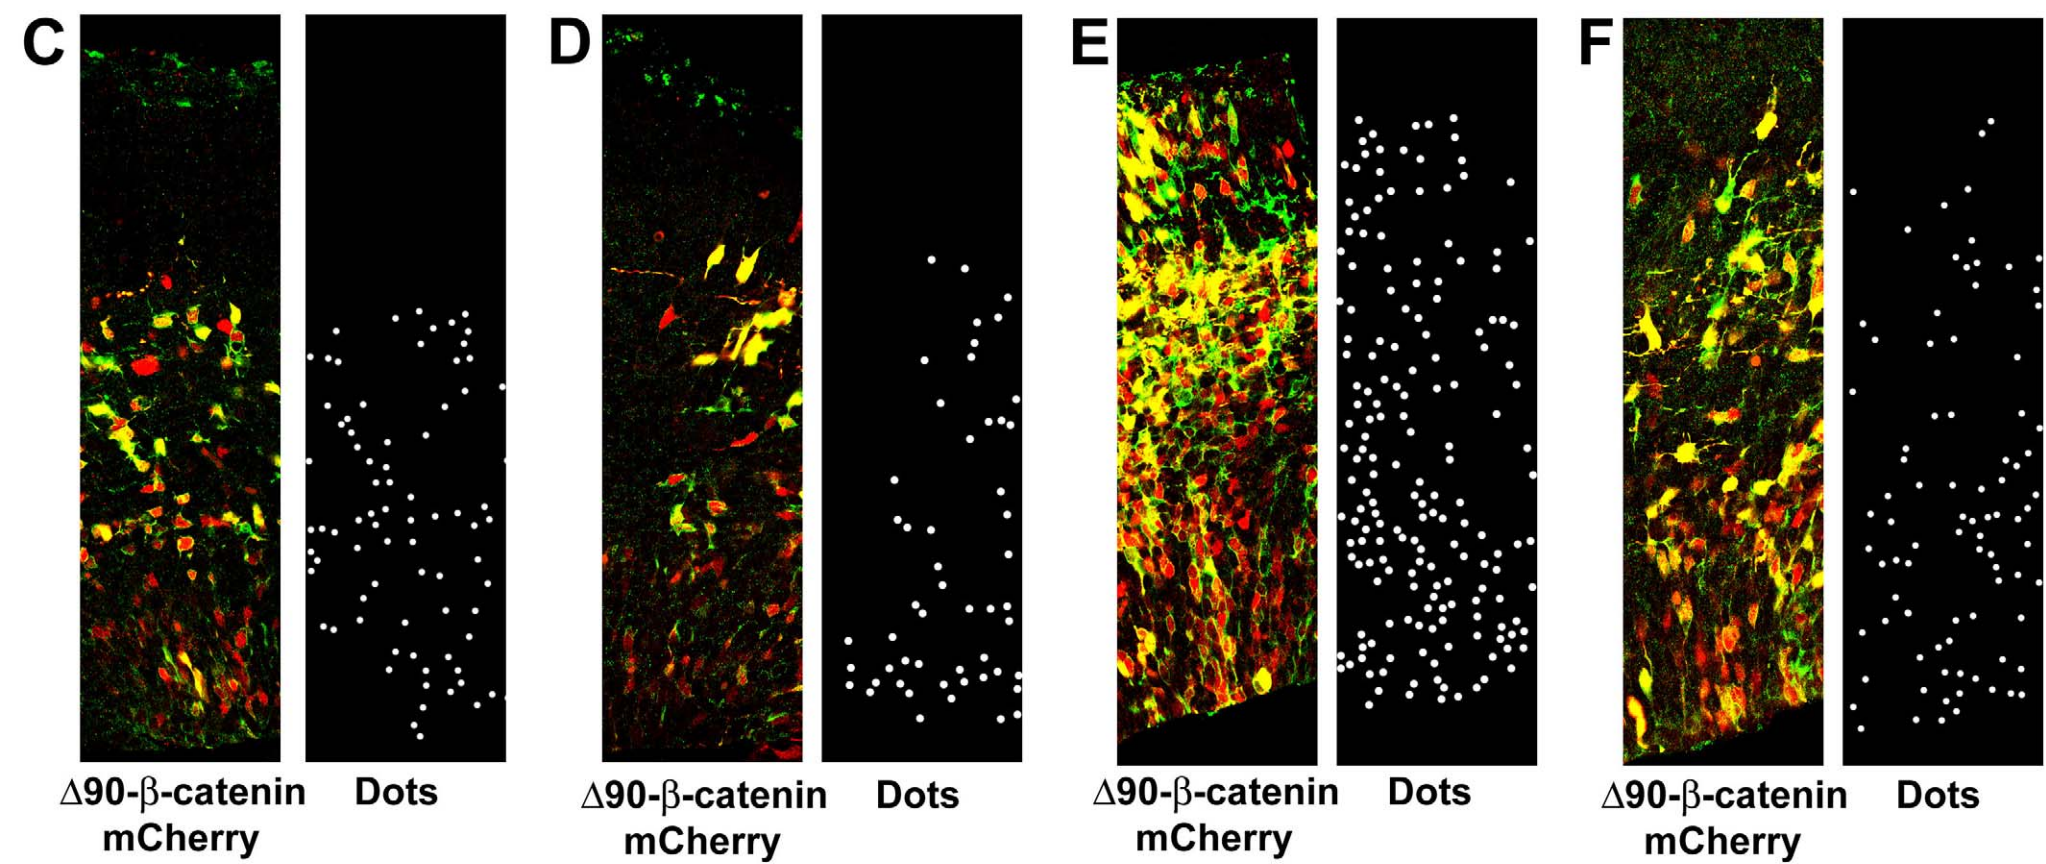

Supplement: NIHMS90485-supplement-05.pdf [file NIHMS90485-supplement-05.pdf]

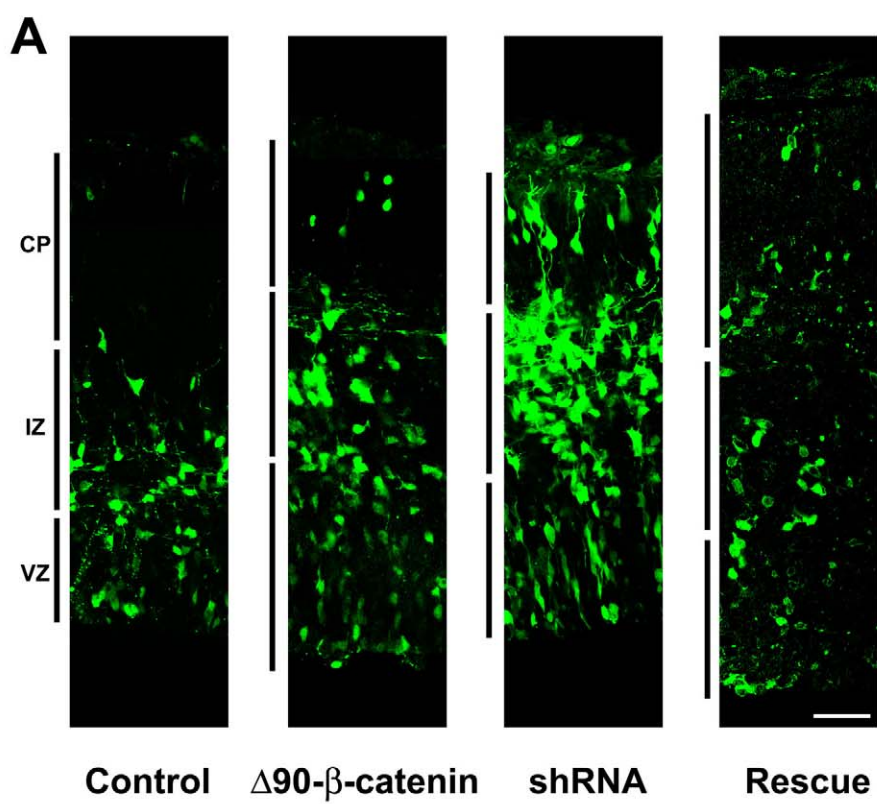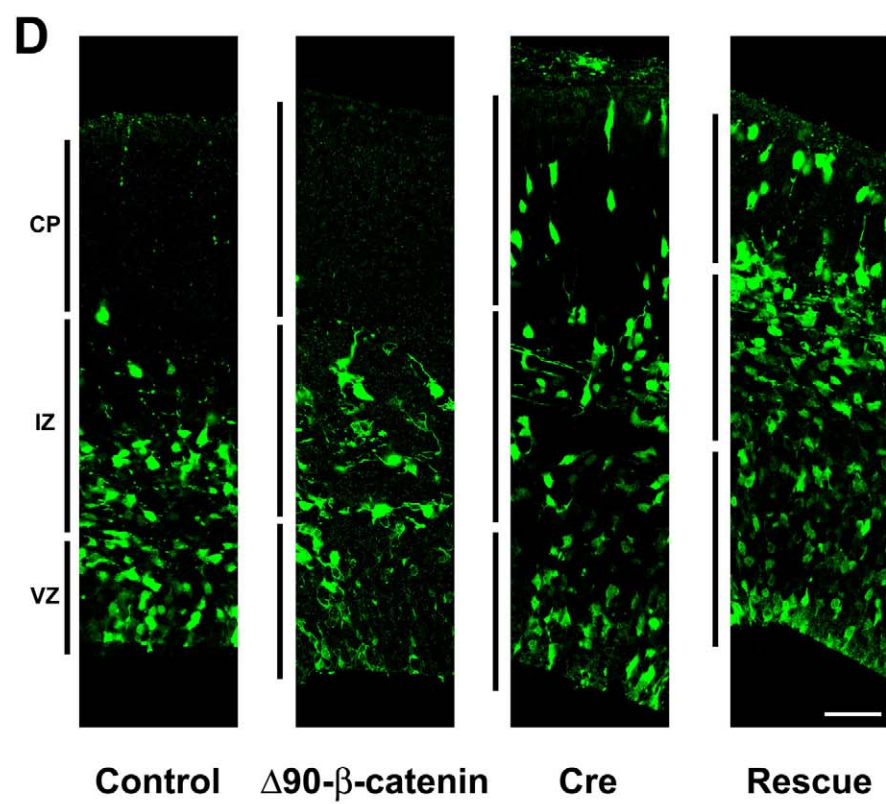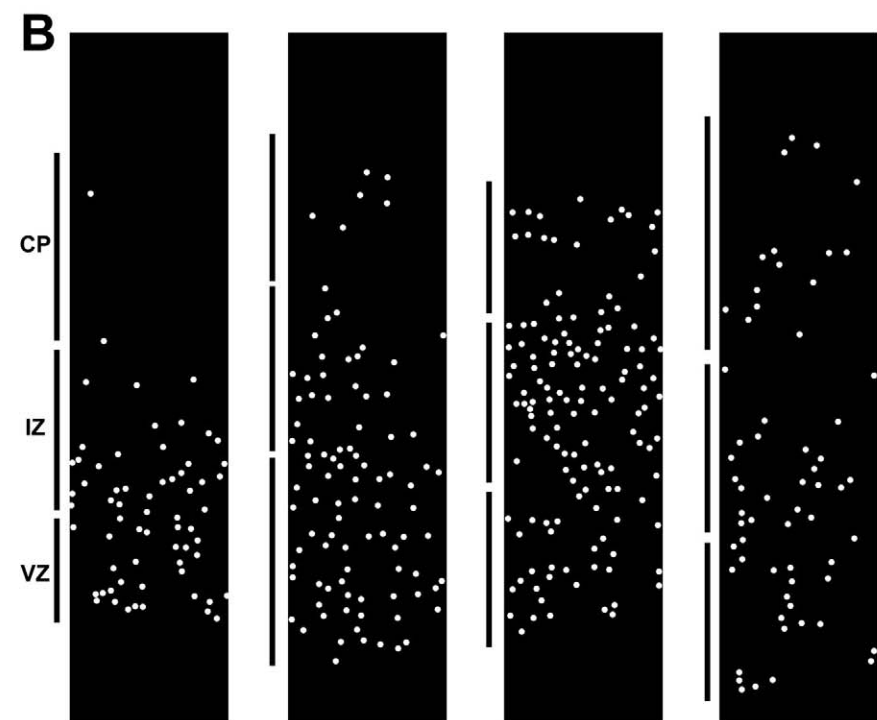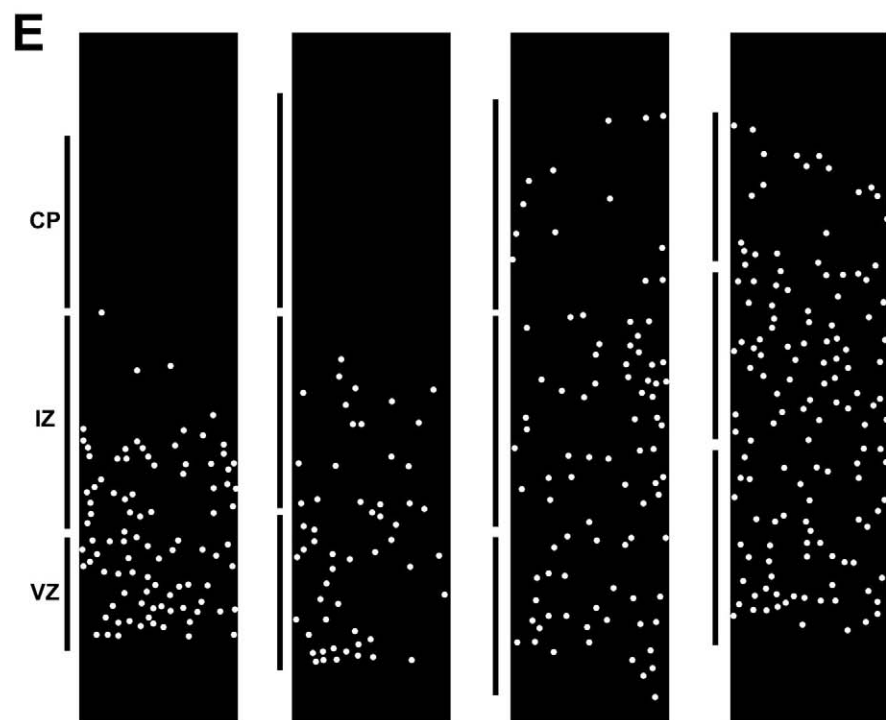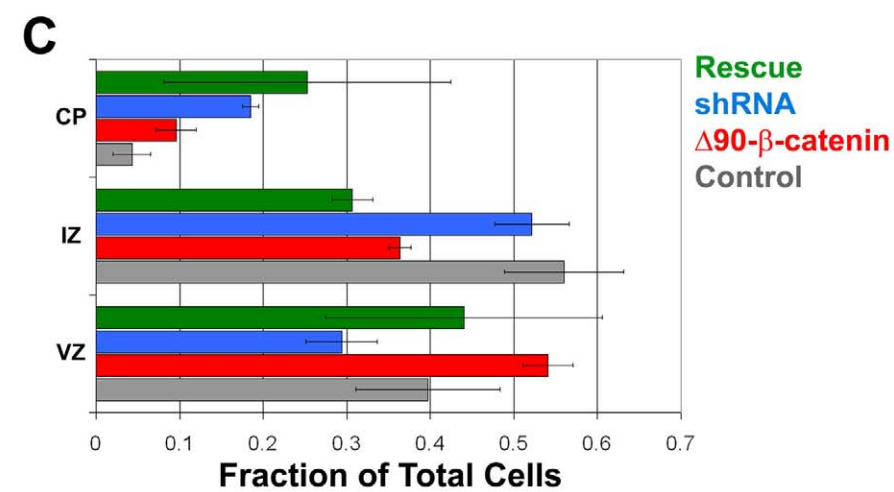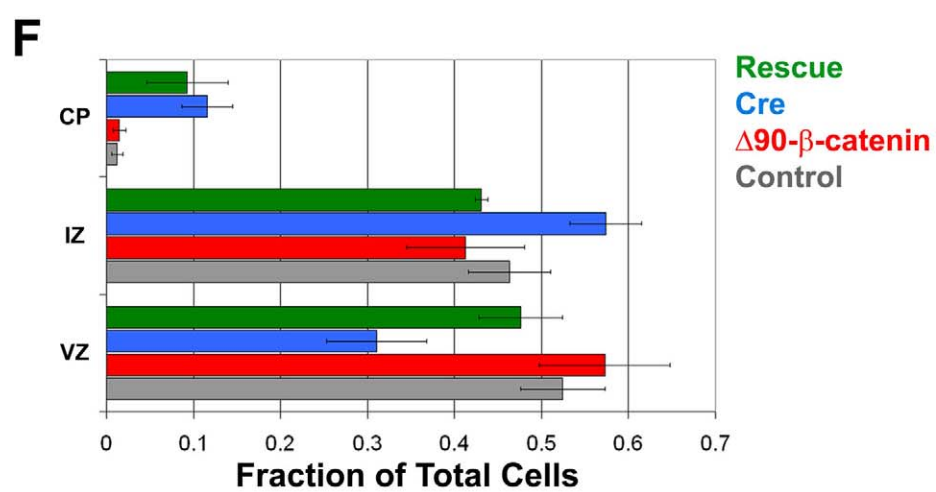

Supplement: NIHMS90485-supplement-06.pdf [file NIHMS90485-supplement-06.pdf]

**A**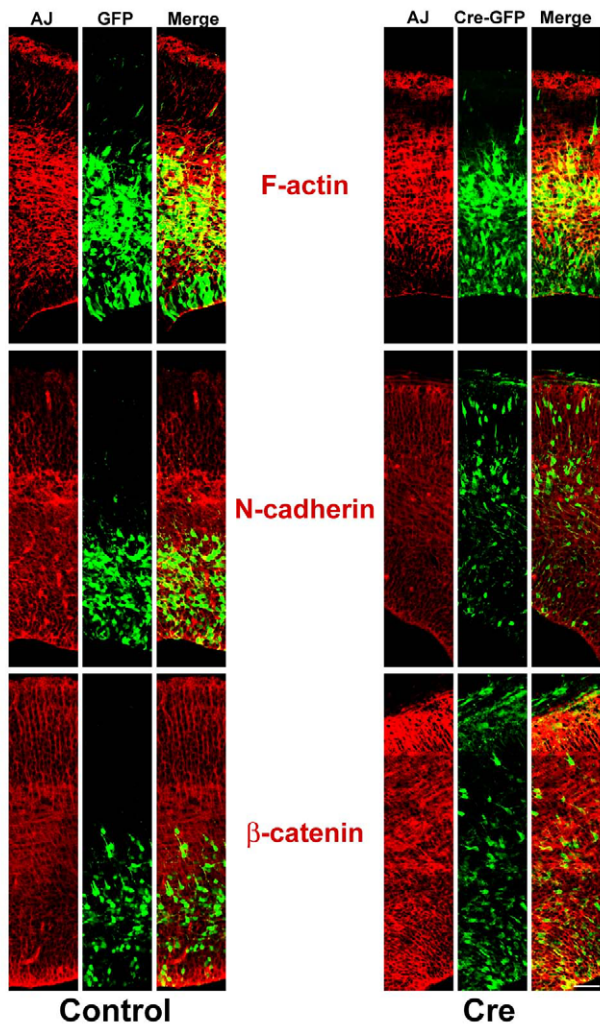**B**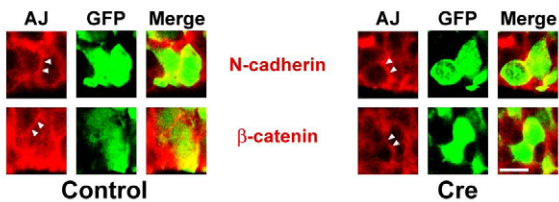

Supplement: NIHMS90485-supplement-07.pdf [file NIHMS90485-supplement-07.pdf]

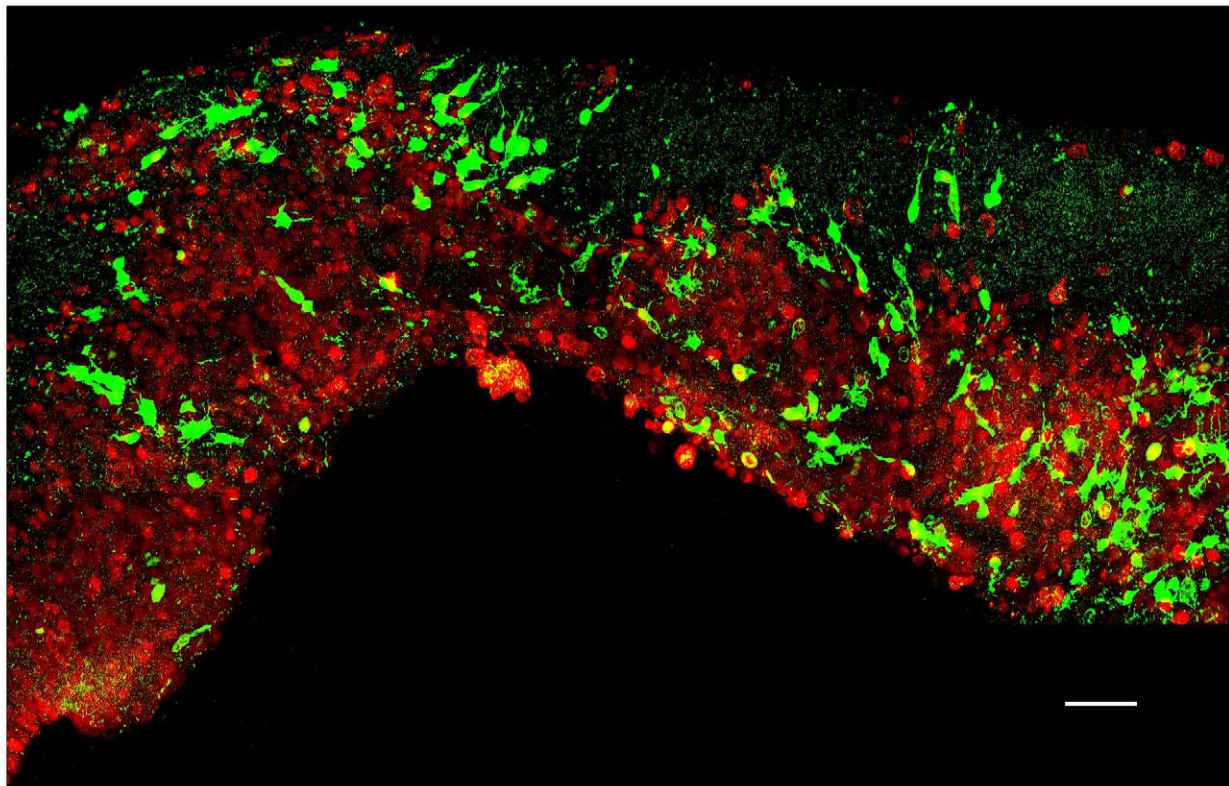

Supplement: NIHMS90485-supplement-08.pdf [file NIHMS90485-supplement-08.pdf]
